# Supplementary material for: K+, Ni and carbon co-modification promoted two-electron O2 reduction for photocatalytic H2O2 production by crystalline carbon nitride
Source: Royal Society of Chemistry journal article supplement (doi:10.1039/d1ta06960h), 2021-01-01
Supplement: d1ta06960h1.pdf [file d1ta06960h1.pdf]

**K<sup>+</sup>, Ni and carbon co-modification promoted two-electron O<sub>2</sub> reduction for  
photocatalytic H<sub>2</sub>O<sub>2</sub> production by crystalline carbon nitride**

Yanfang Chen, Xuemei Yan, Jixiang Xu\*, Lei Wang\*

Key Laboratory of Eco-Chemical Engineering, Ministry of Education, State  
Laboratory of Inorganic Synthesis and Applied Chemistry, College of Chemistry and  
Molecular Engineering, Qingdao University of Science and Technology, Qingdao  
266042, China

---

\* Corresponding Authors: [xujix47@163.com](mailto:xujix47@163.com) (J.X. Xu); [inorchemwl@126.com](mailto:inorchemwl@126.com) (L. Wang)

## Experimental section

### Characterization

Powder X-ray diffraction (XRD) data were collected using a Rigaku D-MAX 2500/PC diffractometer equipped with a Cu K $\alpha$  radiation source. X-ray photoelectron spectra (XPS) were recorded using an X-ray photoelectron spectrometer (Thermo Scientific, K $\alpha$ ) equipped with a monochromatic Al K $\alpha$  X-ray source ( $h\nu = 1486.6$  eV). UV-visible diffuse reflectance spectra were recorded using a Lambda 750 UV/VIS/NIR spectrometer. The morphology of the samples was investigated by using scanning electron microscopy (SEM, SU8000) and transmission electron microscopy (TEM, JEM-ARM 200F, JEOL). Energy-dispersive X-ray (EDX) elemental mapping were recorded using a Bruker super-X energy-dispersive X-ray spectrometer. A Fluor-spectrophotometer (F-4500 FL) was used to record photoluminescence (PL) spectra. Fourier transform infrared (FTIR) spectra were recorded on a Nicolet 6700 spectrometer with KBr pellet (Thermo scientific, USA). O<sub>2</sub> adsorption on the catalysts was measured by temperature programmed desorption (TPD) using a chemisorption Analyzer (AutoChem II 2920, Micromeritics).

### Electrochemical and photoelectrochemical measurements

The photocurrent measurements and electrochemical impedance spectroscopy (EIS) were recorded using a standard three-electrode electrochemical analyzer (PEC2000, Beijing). The sample coated onto an FTO electrode acts as the working electrode; a SCE (saturated calomel electrode) acts as the reference electrode; a Pt foil acts as the counter electrode. A 300-W Xe arc lamp (PLS-SXE300) was used as the light source.

A 0.5 M Na<sub>2</sub>SO<sub>4</sub> aqueous solution was used as the electrolyte. The rotating disk electrode (RDE) measurements were performed on with an Ag/AgCl electrode and a Pt electrode as reference and counter electrode, respectively. The LSV curves were obtained in an O<sub>2</sub>-saturated 0.1 M phosphate buffer solution. O<sub>2</sub> was kept flowing on the liquid surface of the electrolyte during testing. The average transfer electron number ( $n$ ) in the overall O<sub>2</sub> reduction was obtained by the slopes of Koutecky–Levich plots with the following equation:

$$j^{-1} = j_k^{-1} + B^{-1}\Omega^{-1/2}$$

$$B = 0.2nFv^{-1/6}CD^{2/3}$$

where  $j$ ,  $j_k$ , and  $\Omega$  are the tested current density, kinetic current density, and rotating speed (rpm), respectively.  $F$  and  $v$  are the Faraday constant (96485 C mol<sup>-1</sup>) and kinetic viscosity of water (0.01 cm<sup>2</sup> s<sup>-1</sup>),  $C$  and  $D$  are the bulk concentration of O<sub>2</sub> in water (1.26 × 10<sup>-3</sup> mol cm<sup>-3</sup>) and the diffusion coefficient of O<sub>2</sub> (2.7 × 10<sup>-5</sup> cm<sup>2</sup> s<sup>-1</sup>).

### **Photocatalytic H<sub>2</sub>O<sub>2</sub> production**

10 mg of obtained photocatalyst was dispersed into 50 mL pure water. Then, oxygen was bubbled to achieve saturation adsorption. After that, the suspension was irradiated by a 300 W Xenon lamp equipped with a 420 nm cut off filter. 5 mL of suspension was withdrawn at each time interval and the concentration of produced H<sub>2</sub>O<sub>2</sub> was determined by iodometry. To evaluate the recyclability of the photocatalyst, the sample was collected by centrifugation and washed with deionized water and dried before use in the next cycle experiments.

### **H<sub>2</sub>O<sub>2</sub> decomposition tests**

The H<sub>2</sub>O<sub>2</sub> decomposition behavior was studied by dispersing 10 mg of catalyst in 50 mL of 1 mmol L<sup>-1</sup> H<sub>2</sub>O<sub>2</sub> solution and irradiating with visible light ( $\lambda \geq 420$  nm) under continuous stirring. About 5 mL of the suspension was withdrawn at various time intervals and was then centrifuged to remove catalyst prior to determination of H<sub>2</sub>O<sub>2</sub> concentration.

### Measurement of H<sub>2</sub>O<sub>2</sub> concentration

0.05 mL of 0.01 mol L<sup>-1</sup> ammonium molybdate aqueous solution and 2 mL of 0.1 mol L<sup>-1</sup> potassium iodide aqueous solution were added to 1 mL obtained solution, and kept for 30 min. The H<sub>2</sub>O<sub>2</sub> molecules reacted with iodide anions (I<sup>-</sup>) to produce triiodide anions (I<sub>3</sub><sup>-</sup>). The amount of I<sub>3</sub><sup>-</sup> was determined by means of UV-vis spectroscopy on the basis of the absorbance at 350 nm, from which the amount of H<sub>2</sub>O<sub>2</sub> produced was estimated by the equation which given in Figure S1.

### Apparent quantum yield calculation

$$\begin{aligned}
 AQY &= \frac{\text{Number of reacted electrons}}{\text{Number of incident photons}} \times 100\% \\
 &= \frac{2 \times \text{number of evolved } H_2O_2 \text{ molecules}}{\text{Number of incident photons}} \times 100\% \\
 &= \frac{2 \times n_{H_2O_2}}{n_p} \times 100\% \\
 &= \frac{2 \times n_{H_2O_2}}{\frac{P \times t \times \lambda}{h \times c}} \times 100\%
 \end{aligned}$$

In this equation,  $n_{H_2O_2}$  and  $n_p$  is the number of H<sub>2</sub>O<sub>2</sub> molecules and photons, respectively,  $P$  denotes the light power, determined by CEL-NP2000 power meter;  $t$  is the illumination time (3600 s);  $\lambda$  is the incident light wavelength (420 nm);  $h$

represents the Planck constant ( $6.63 \times 10^{-34}$  J·s); and  $c$  is the light speed ( $3.0 \times 10^8$  m·s<sup>-1</sup>).

### **Method of DFT calculation**

DFT calculations were performed in the Vienna ab initio simulation package (VASP). A spin-polarized GGA PBE functional, all-electron plane-wave basis sets with an energy cutoff of 520 eV, and a projector augmented wave (PAW) method were adopted. A ( $3 \times 3 \times 1$ ) Monkhorst-Pack mesh was used for the Brillouin-zone integrations to be sampled. The conjugate gradient algorithm was used in the optimization. The convergence threshold was set  $1 \times 10^{-4}$  eV in total energy and 0.05 eV/Å in force on each atom.

The adsorption energy change ( $\Delta E_{\text{abs}}$ ) was determined as follows:

$$\Delta E_{\text{abs}} = E_{\text{total}} - E_{\text{sur}} - E_{\text{mol}}$$

where  $E_{\text{total}}$  is the total energy for the adsorption state,  $E_{\text{sur}}$  is the energy of pure surface,  $E_{\text{mol}}$  is the energy of substrate.

## Results Section

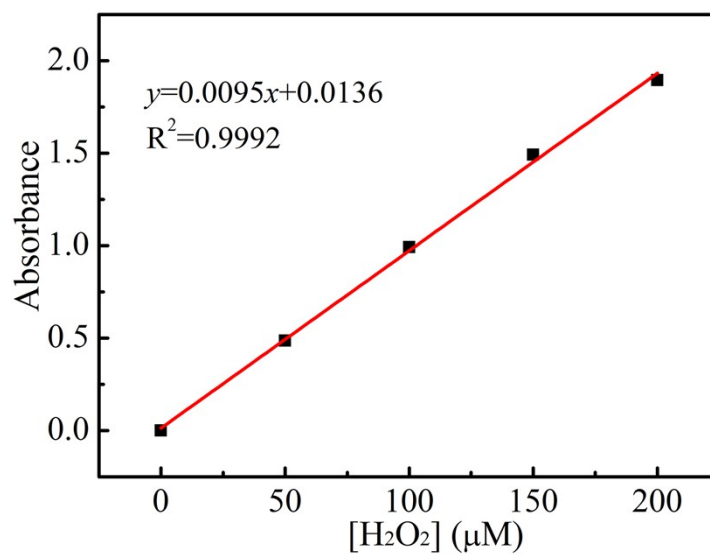

**Fig. S1.** The standard curve used for determination the concentration of H<sub>2</sub>O<sub>2</sub>.

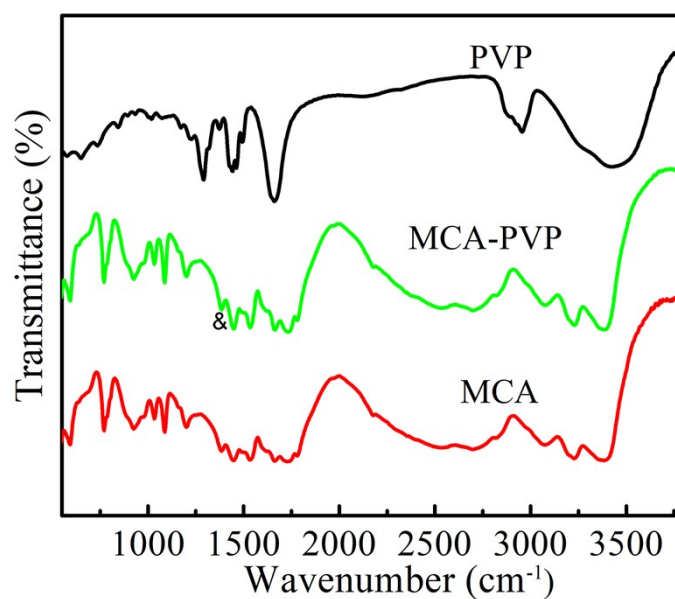

**Fig. S2.** FTIR spectra of PVP, MCA-PVP, and MCA samples.

Compared to FTIR spectrum of MCA, a new peak at 1400 cm<sup>-1</sup> corresponding to bend vibration of CH<sub>2</sub> was observed. This indicates MCA was encapsulated by PVP.

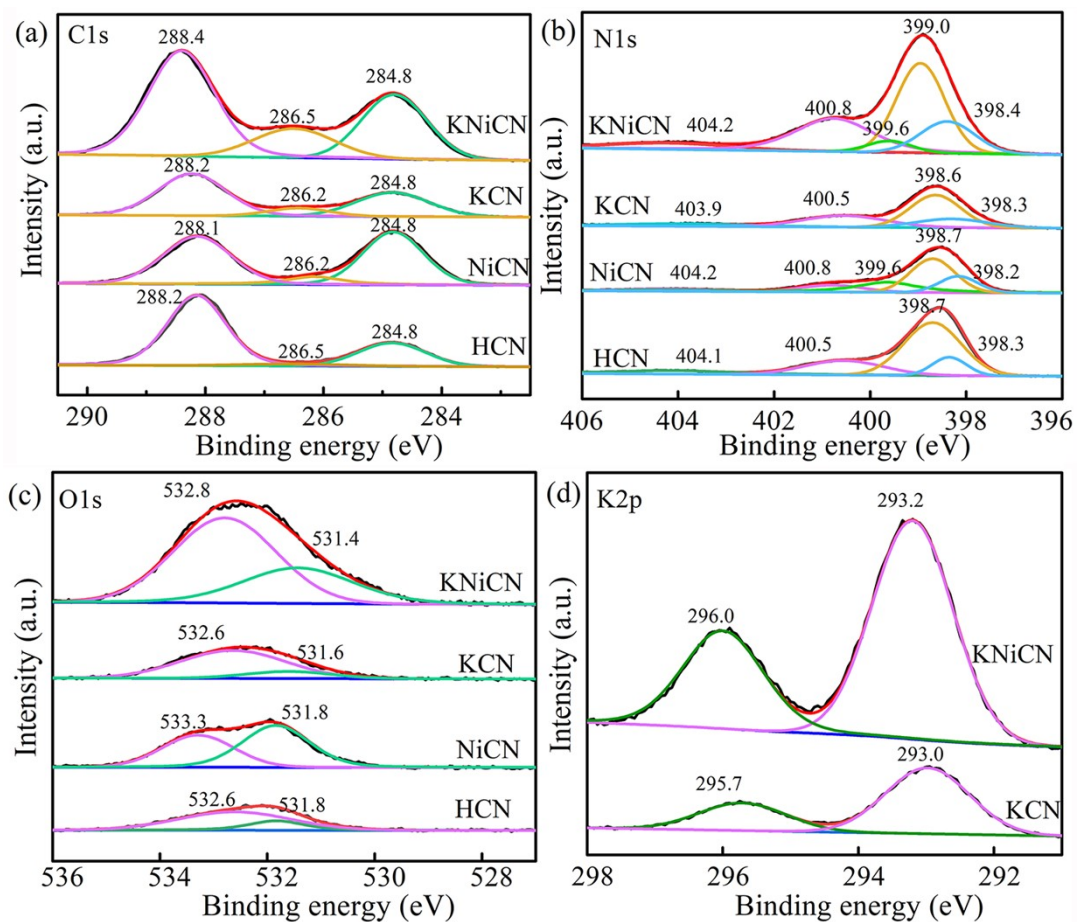

**Fig. S3.** High-resolution XPS spectra of (a) C1s, (b) N1s, (c) O1s, and (d) K2p of HCN, NiCN, KCN, and KNiCN samples.

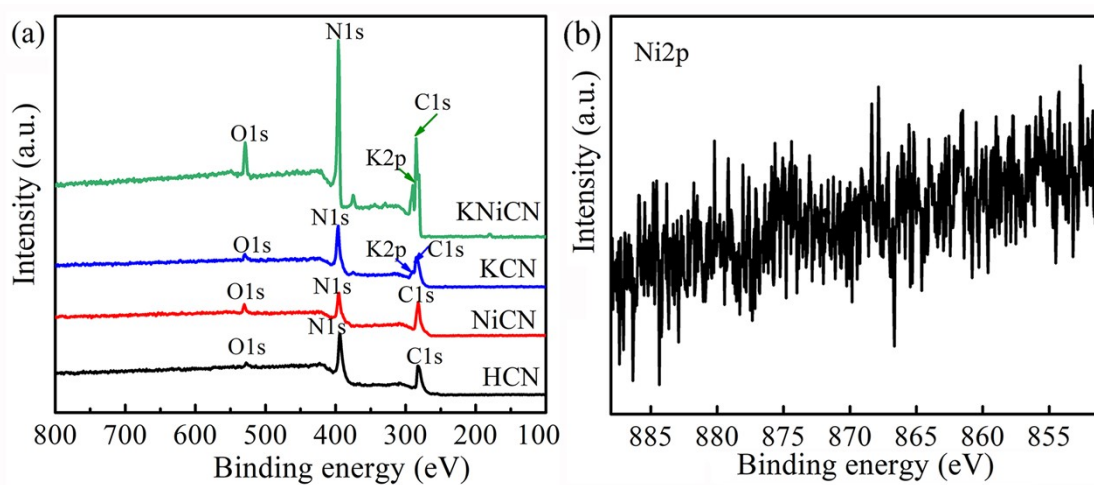

**Fig. S4.** (a) The survey XPS spectrum of obtained samples, (b) high-resolution XPS spectra of Ni2p in KNiCN.

The Ni2p peak could not be detected clearly in KNiCN owing to the low Ni content (24.2mg/kg<sub>KNiCN</sub>, measured by ICP) on the catalysts surface and the limited analysis depth of XPS (10 nm). But the zeta potentials of KCN and KNiCN were measured. Values of -36 and -33.6 mV were obtained for KCN and KNiCN, respectively. The less negative charge of KNiCN suggests that the Ni bears a positive charge.

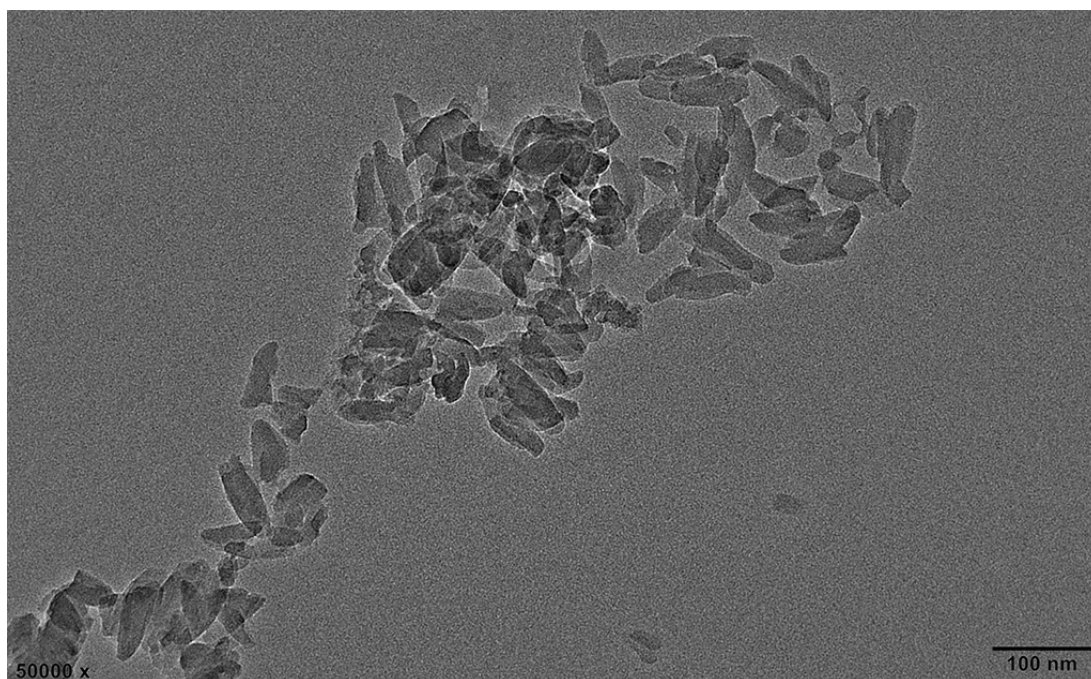

**Fig. S5.** TEM image of KCN.



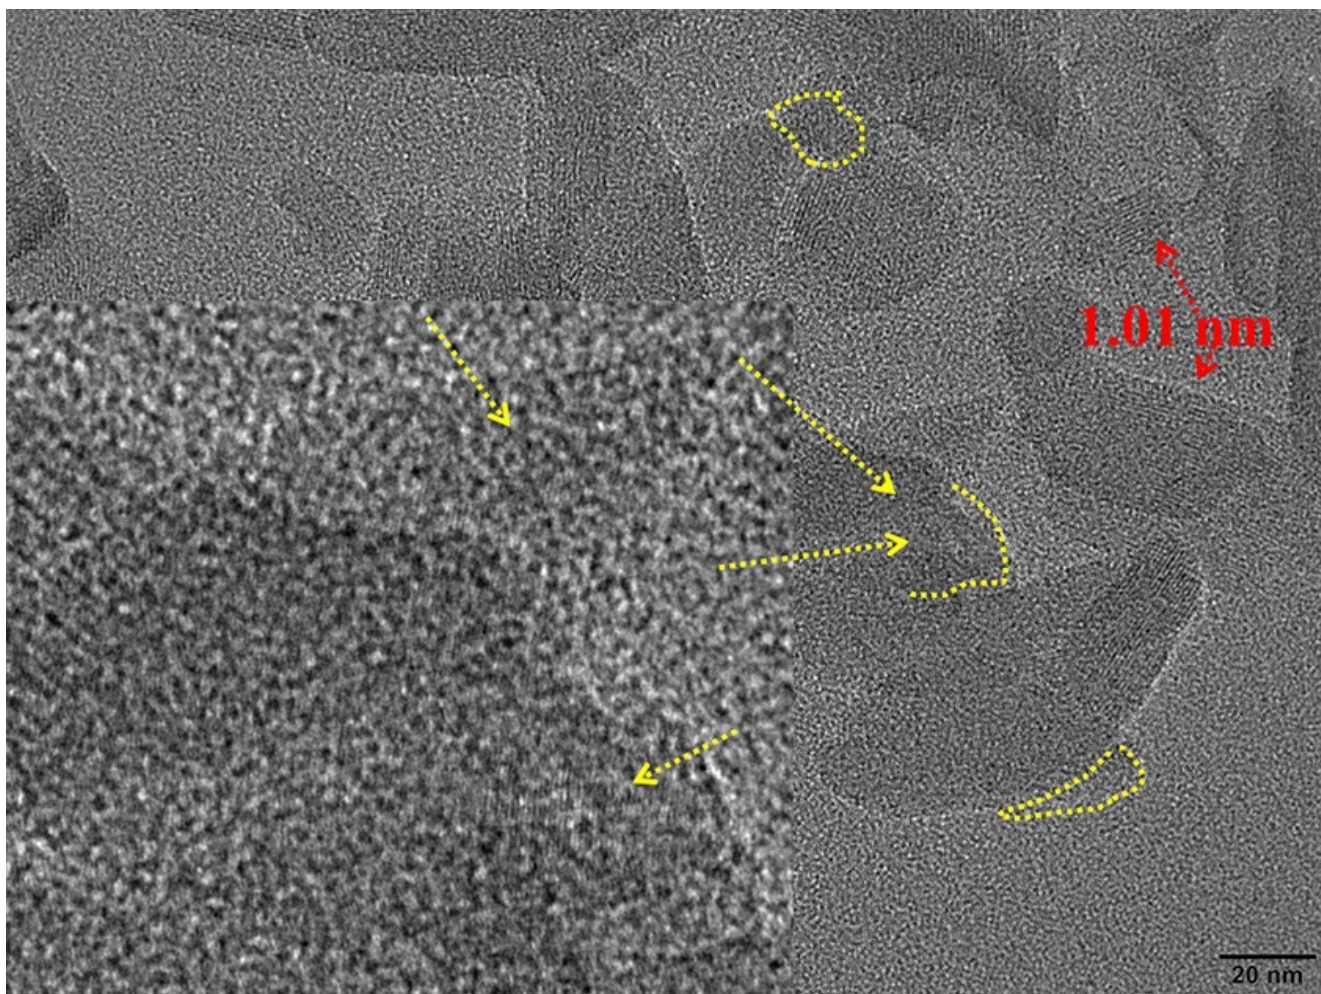

**Fig. S6.** HRTEM image of KNiCN (the inset is partial enlarged image).

KNiCN exhibits a lattice fringe with interlayer distances of 1.01 nm (red arrows), which was attributed to in-plane repeated units. In addition, a 0.21 nm lattice fringe was observed (inset), which was ascribed to the (100) planes of graphite (marked by arrows).

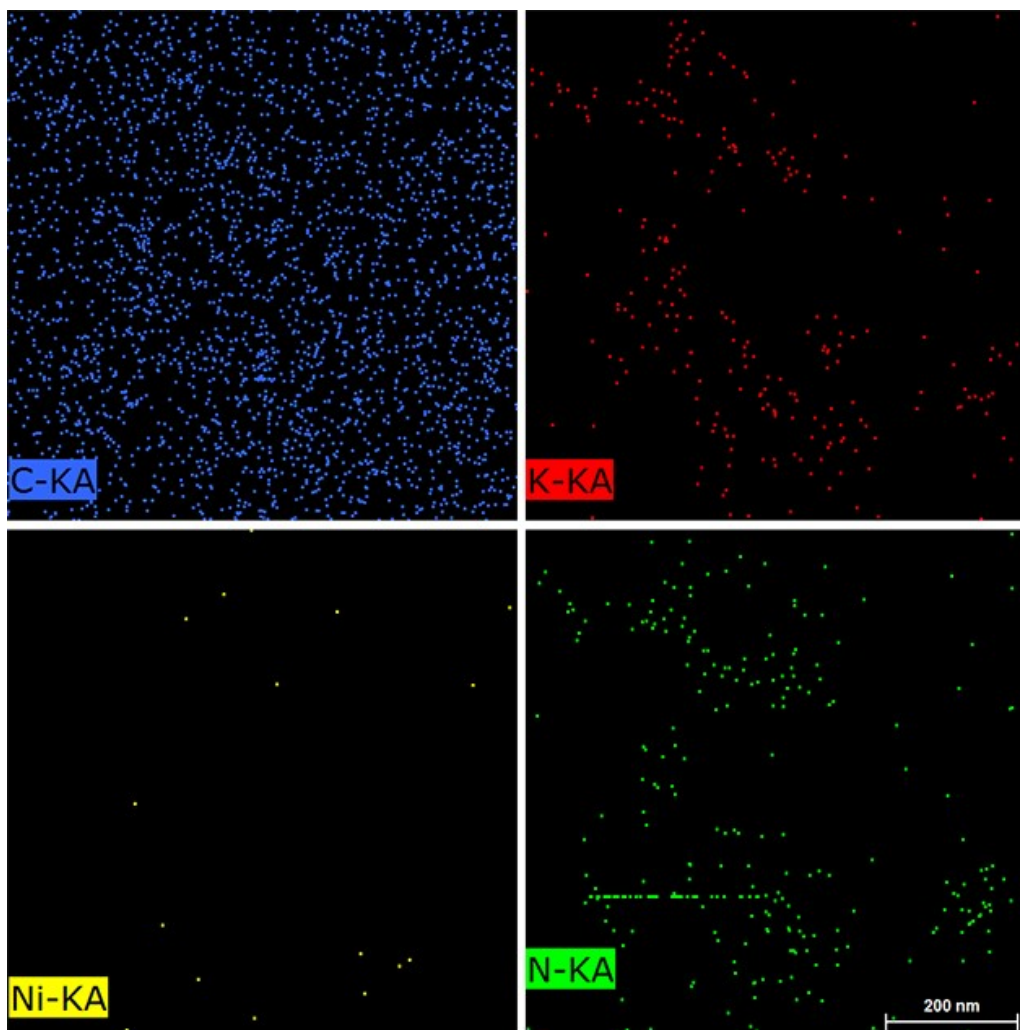

**Fig. S7.** EDX elemental mapping of C, N, Ni, and K of KNiCN sample.

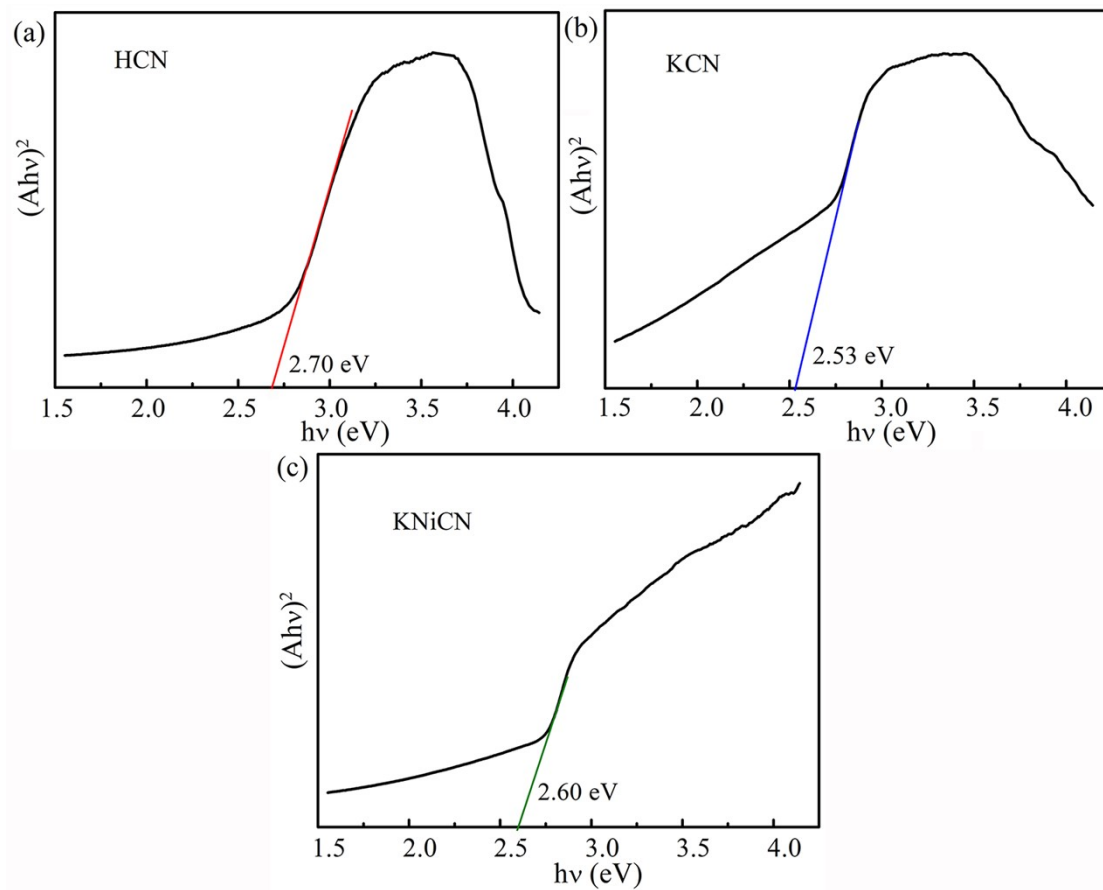

**Fig. S8.** Plots of transformed Kubelka–Munk function of HCN, KCN, and KNiCN.

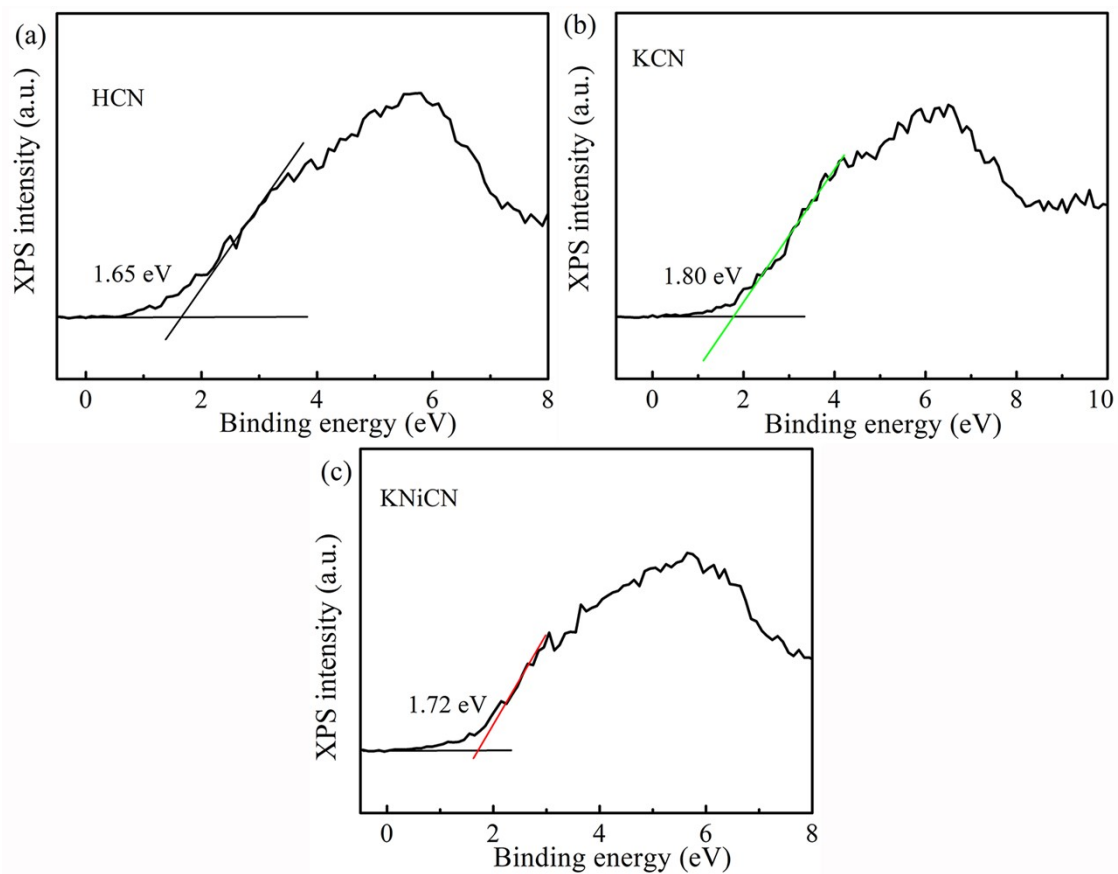

**Fig. S9.** XPS valence band spectra of HCN, KCN, and KNiCN.

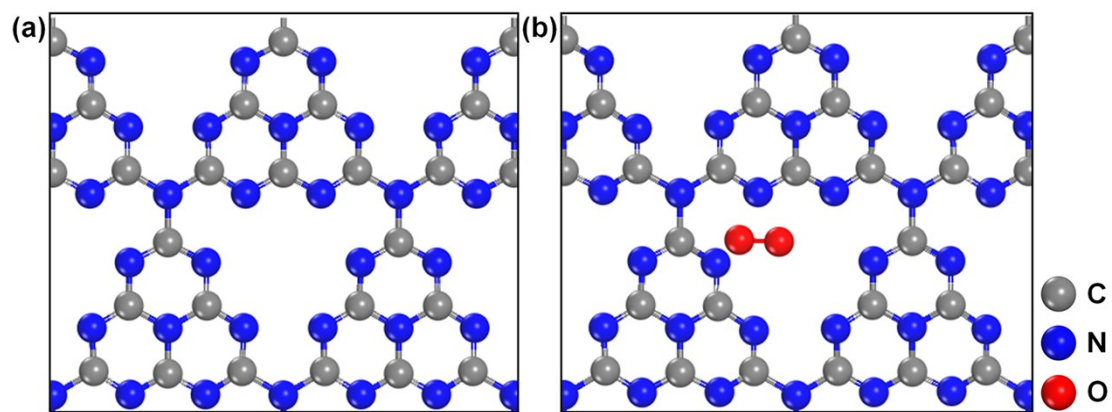

**Fig. S10.** The proposed structure of HCN (a) and O<sub>2</sub> adsorption sites in HCN (b).

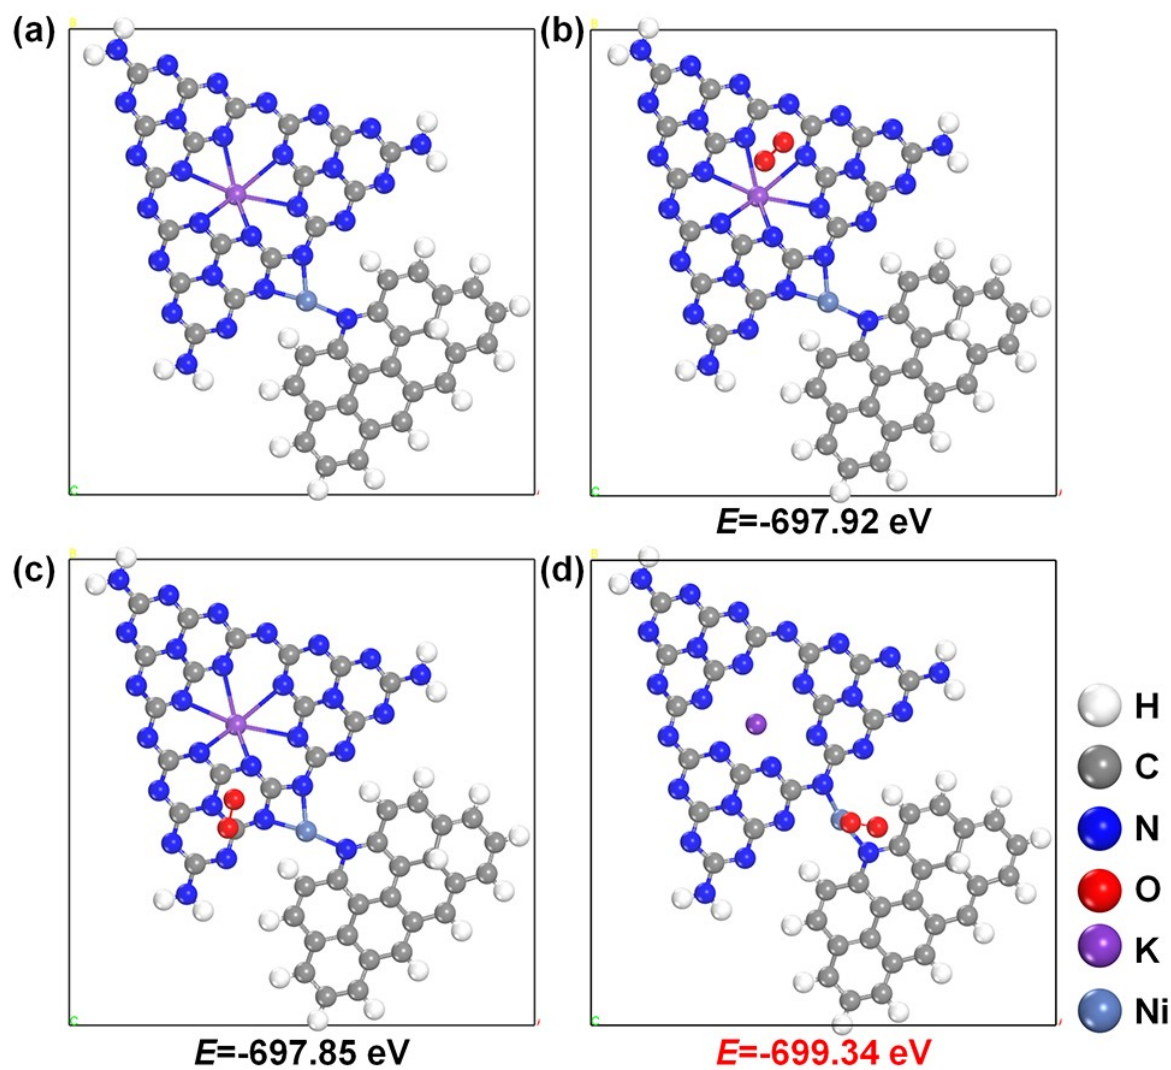

**Fig. S11.** The (a) proposed structure of KNiCN, (b-d) possible O<sub>2</sub> adsorption site in KNiCN sample.

A largest negative energy of  $-699.34 \text{ eV}$  obtained with the structure of (d), where Ni was bonded with two N atoms coming from g-C<sub>3</sub>N<sub>4</sub> and N-doped carbon. The O<sub>2</sub> molecules would prefer to adsorb on the Ni-N<sub>2</sub> sites.

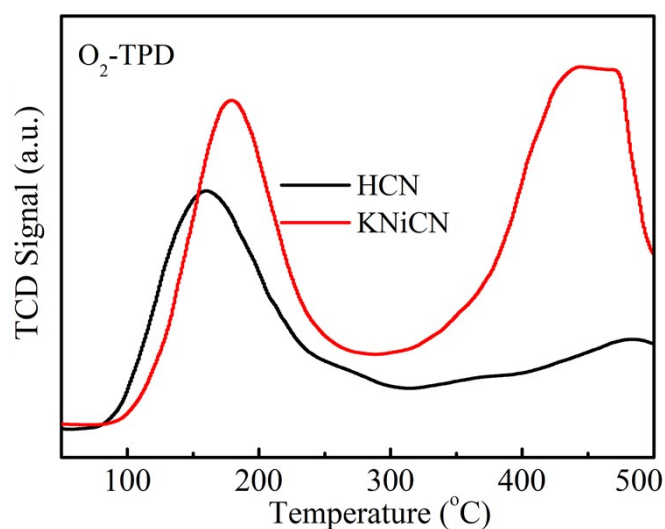

**Fig. S12.** MS signals of O<sub>2</sub> desorption for O<sub>2</sub>-TPD profiles over samples of HCN and KNiCN.

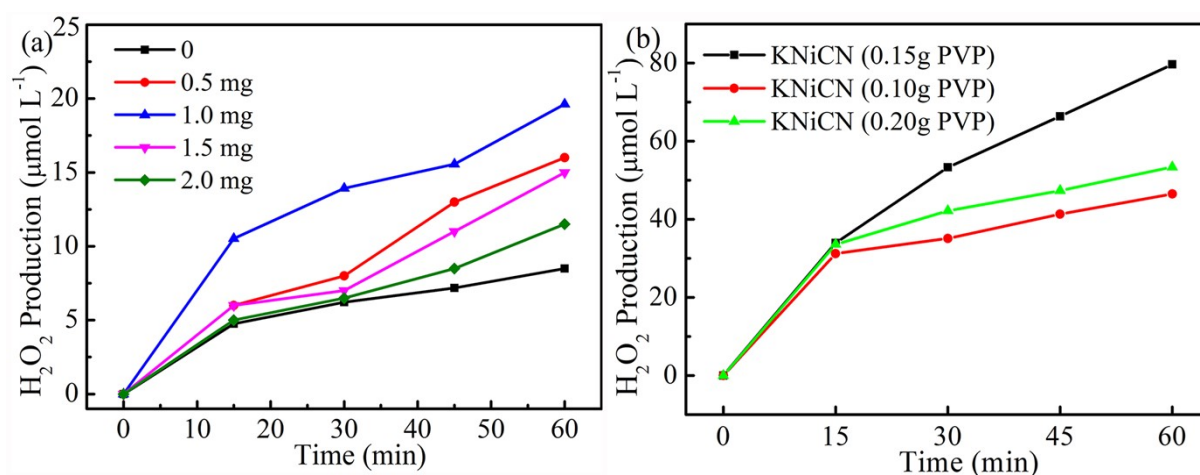

**Fig. S13.** Effect of (a) Ni<sup>2+</sup> and (b) PVP amounts on H<sub>2</sub>O<sub>2</sub> production.

Compared to HCN, all Ni modified CN exhibited better H<sub>2</sub>O<sub>2</sub> production activity than HCN with NiCN prepared by calcination with PVP/MCA loaded with 1 mg Ni<sup>2+</sup> generating optimal H<sub>2</sub>O<sub>2</sub> yields of 19.6 μM. Moreover, when the mass ratio of PVP to MCA is 0.15 : 0.2, the obtained KNiCN shows the highest H<sub>2</sub>O<sub>2</sub> production activity.

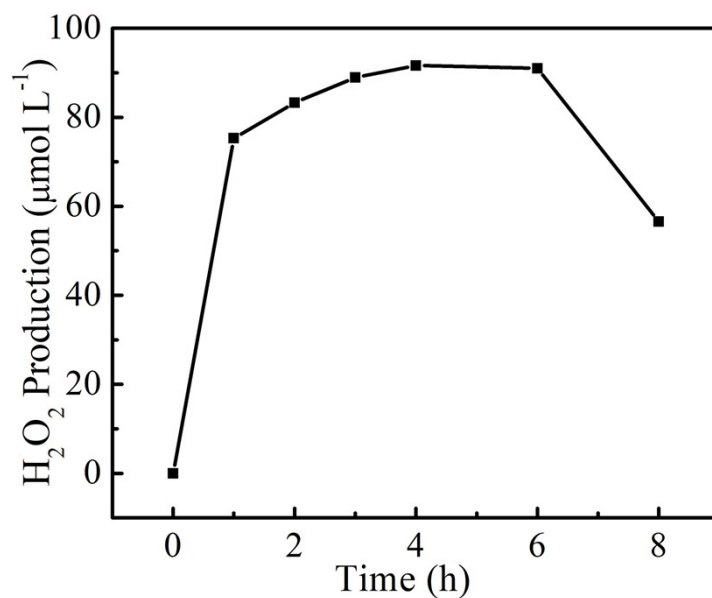

**Fig. S14.** The yield of H<sub>2</sub>O<sub>2</sub> with time prolong over KNiCN.

A linear increment in the H<sub>2</sub>O<sub>2</sub> concentration is observed for KNiCN up to a test run of 6 h, after which its concentration decreased, indicating that the H<sub>2</sub>O<sub>2</sub> decomposition become serious.

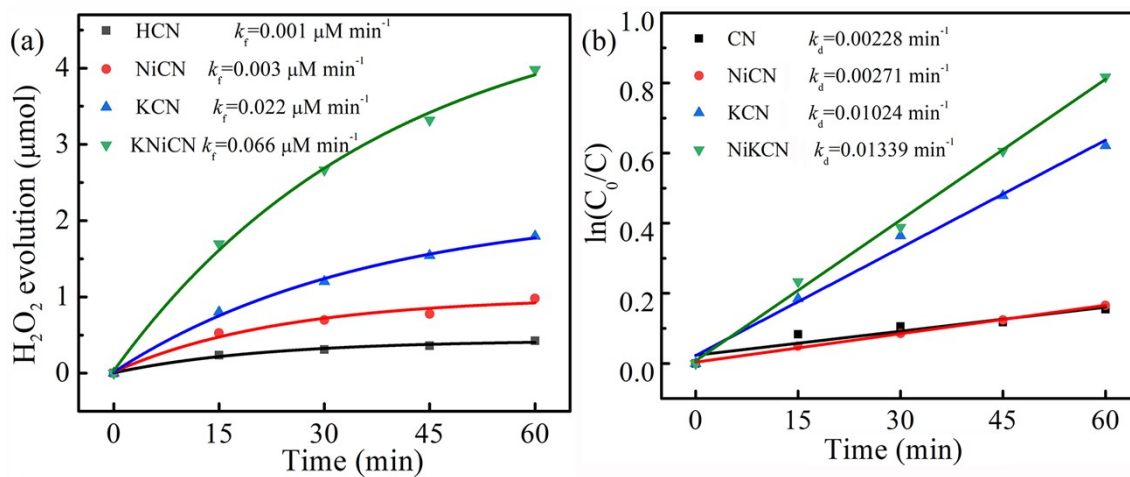

**Fig. S15.** (a) Zero-order and (b) pseudo-first-order kinetic curves of H<sub>2</sub>O<sub>2</sub> formation and degradation, respectively over HCN, NiCN, KCN, and KNiCN.

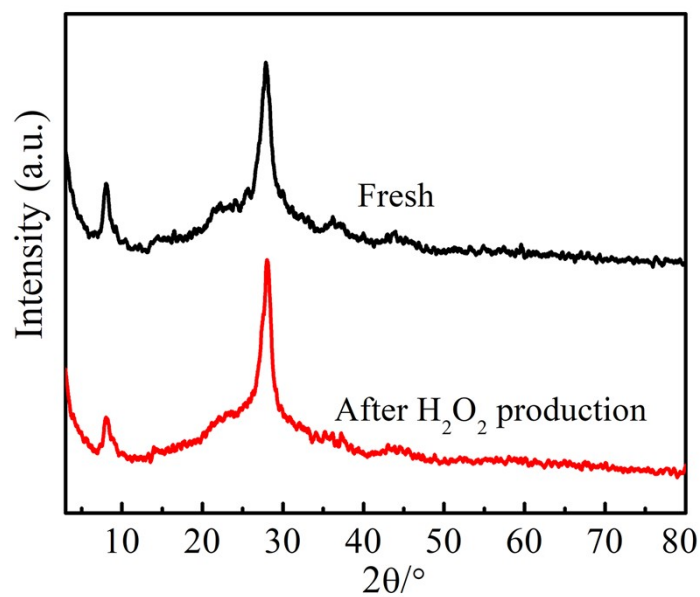

**Fig. S16.** XRD patterns of fresh and used KNiCN.

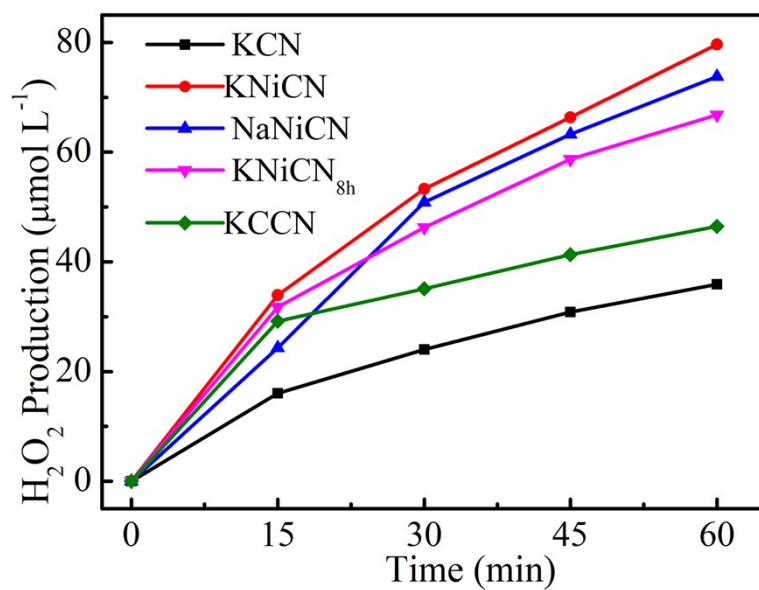

**Fig. S17.** Comparison H<sub>2</sub>O<sub>2</sub> production performance of various samples.



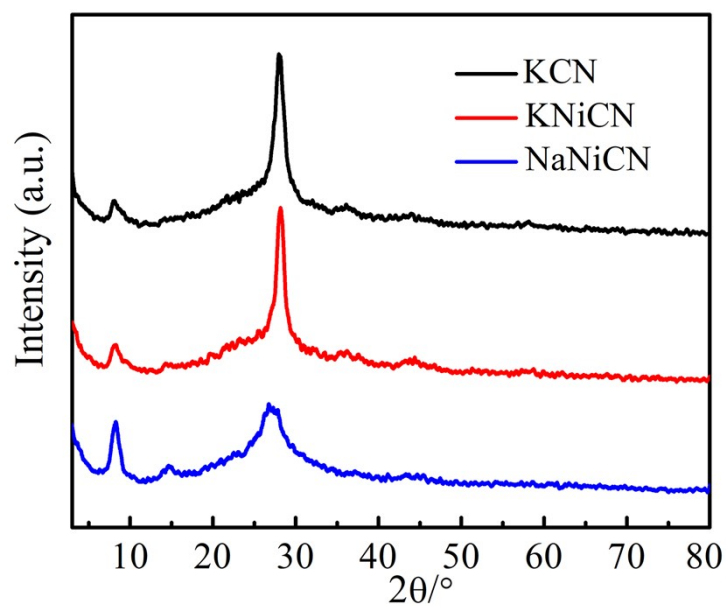

**Fig. S18.** XRD patterns of KCN, KNiCN, and NaNiCN.

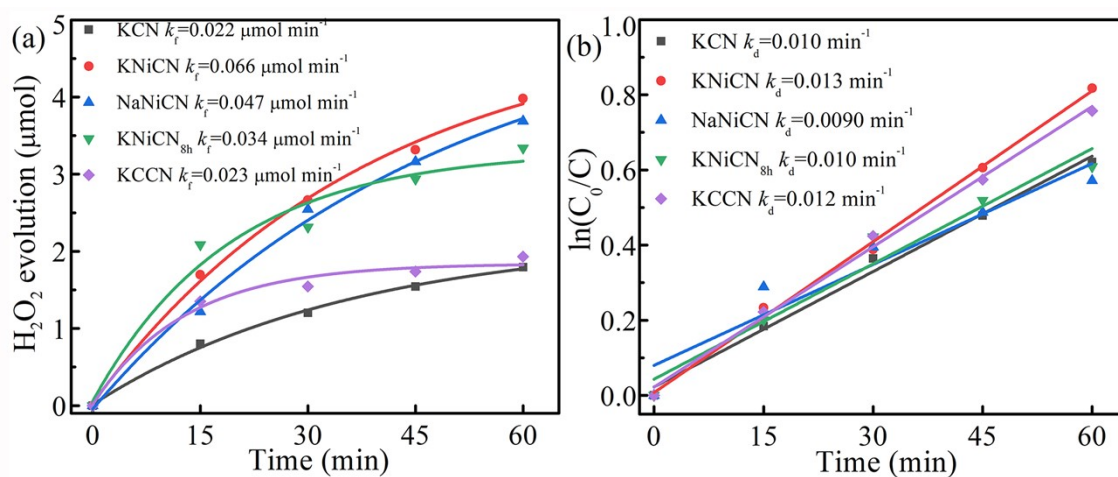

**Fig. S19.** (a) Zero-order and (b) pseudo-first-order kinetic curves of H<sub>2</sub>O<sub>2</sub> formation and degradation, respectively of various samples.

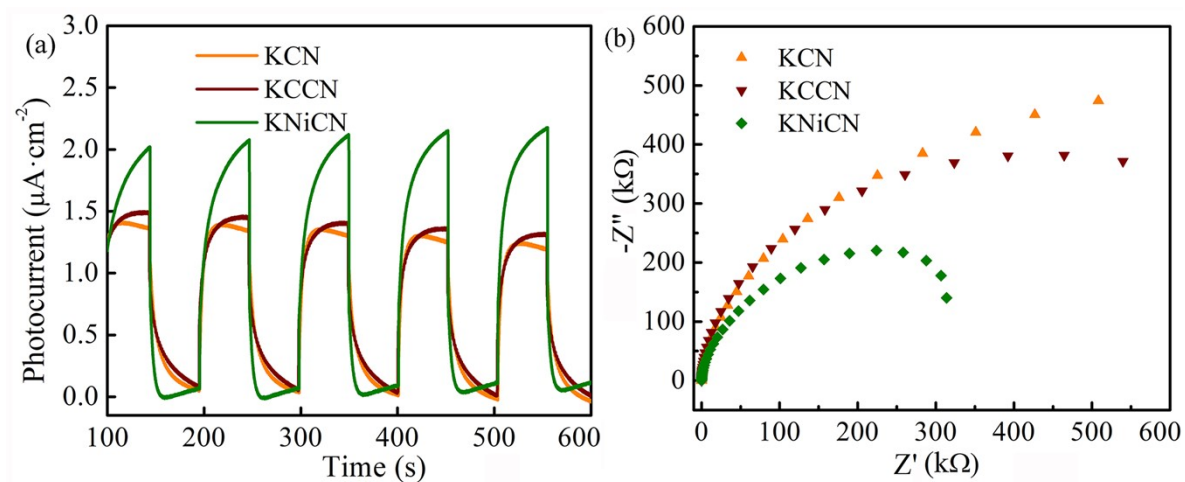

**Fig. S20.** (a) Transient photocurrent, (d) EIS results of KCN, KNiCN, and KCCN.

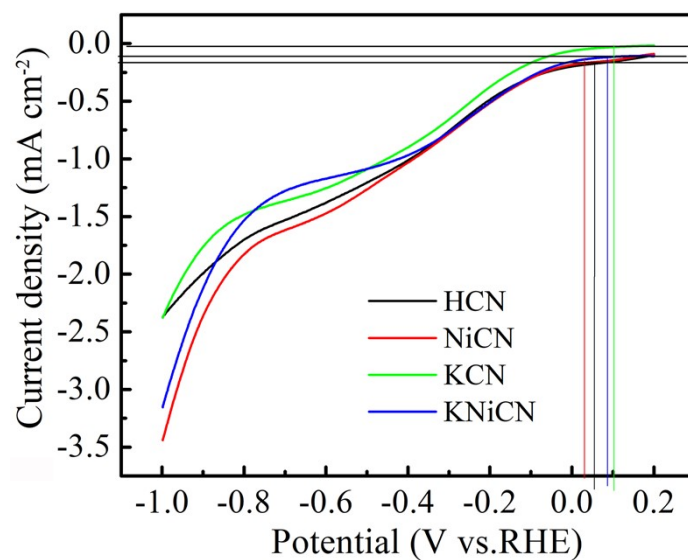

**Fig. S21.** Linear sweep voltammetry (LSV) curves of PCN, BCN, KCN, and KBCN measured on RDE at 1600 rpm.

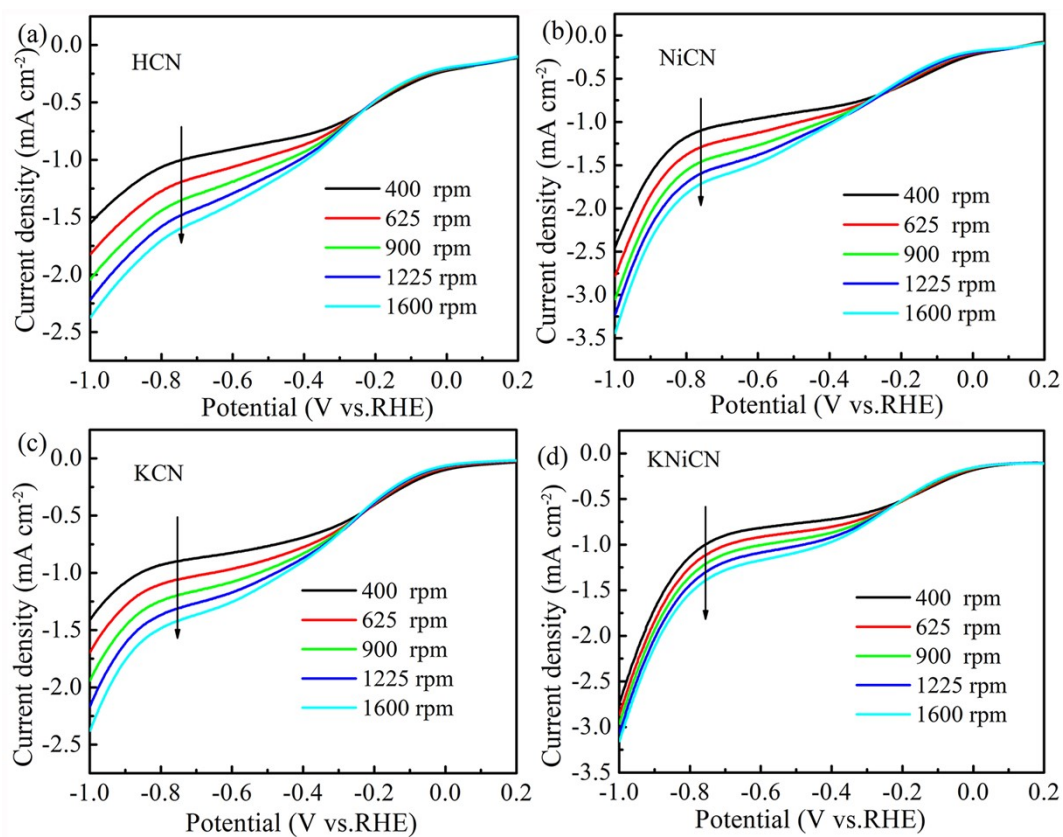

**Fig. S22.** LSV curves of HCN, NiCN, KCN, and KNiCN measured on RDE at different rotating speeds.

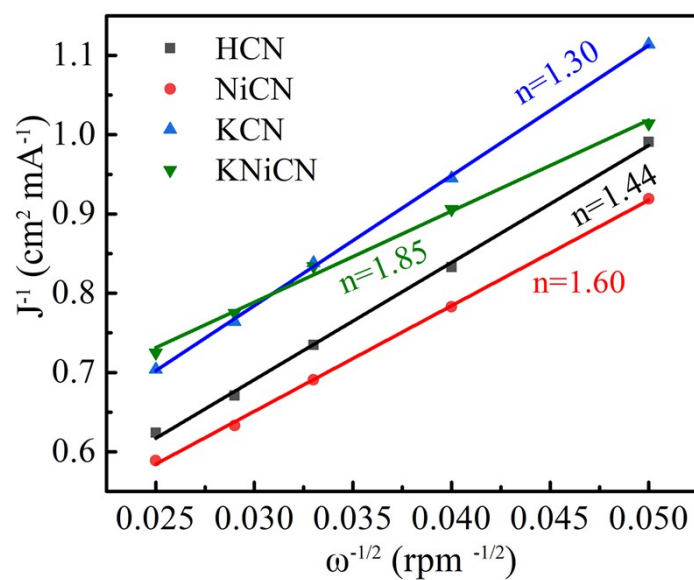

**Fig. S23.** The Koutecky–Levich plots of HCN, NiCN, KCN and KNiCN.

**Table 1** Comparison photocatalytic H<sub>2</sub>O<sub>2</sub> production of g-C<sub>3</sub>N<sub>4</sub>-based catalysts.

| Photocatalysts                                               | H <sub>2</sub> O <sub>2</sub> yield<br>( $\mu\text{mol}\cdot\text{g}^{-1}\cdot\text{h}^{-1}$ ) | Light irradiation                                      | Catalyst/<br>mg | H <sub>2</sub> O/mL | Reference |
|--------------------------------------------------------------|------------------------------------------------------------------------------------------------|--------------------------------------------------------|-----------------|---------------------|-----------|
| Ni-CAT-CN <sub>60</sub>                                      | 1801                                                                                           | Xenon lamp,<br>$\lambda \geq 420$ nm                   | 10              | 15                  | [1]       |
| AQ/U-POCN                                                    | 150                                                                                            | 300 W Xenon lamp,<br>400-780 nm                        | 10              | 20                  | [2]       |
| Co <sub>1</sub> /AQ/ C <sub>3</sub> N <sub>4</sub>           | 124                                                                                            | AM1.5, simulated<br>solar                              | 6               | 12                  | [3]       |
| g-C <sub>3</sub> N <sub>4</sub> /PDI-<br>rGO <sub>0.05</sub> | 24.17                                                                                          | 43.3 W·m <sup>-2</sup> Xenon<br>lamp, 420–500nm        | 50              | 30                  | [4]       |
| R <sub>370</sub> -CN                                         | 170                                                                                            | 300 W Xenon lamp,<br>$\lambda \geq 420$ nm             | 100             | 100                 | [5]       |
| PTA <sub>0.6</sub> /CN                                       | 833                                                                                            | Xenon lamp, 420-<br>700 nm                             | 10              | 15                  | [6]       |
| ACNT-5                                                       | 240.36                                                                                         | AM1.5, simulated<br>solar                              | 50              | 50                  | [7]       |
| Cv-g-C <sub>3</sub> N <sub>4</sub>                           | 92                                                                                             | 300 W Xenon lamp,<br>$\lambda \geq 420$ nm             | 100             | 100                 | [8]       |
| 3DOM g-C <sub>3</sub> N <sub>4</sub> -<br>PW <sub>11</sub>   | 35                                                                                             | 300 W Xenon lamp,<br>$\lambda > 320$ nm                | 100             | 100                 | [9]       |
| g-C <sub>3</sub> N <sub>4</sub> /BDI <sub>50</sub>           | 8.54                                                                                           | simulated solar,<br>420-500 nm                         | 100             | 30                  | [10]      |
| PCNBA-0.2                                                    | ~2.4mg/L                                                                                       | AM1.5, 400-500 nm                                      | 50              | 30                  | [11]      |
| PEI/C <sub>3</sub> N <sub>4</sub>                            | 208.1                                                                                          | 100mW·cm <sup>-2</sup> ,<br>simulated solar            | 20              | 20                  | [12]      |
| g-C <sub>3</sub> N <sub>4</sub> -CoWO                        | 187.5                                                                                          | 300 W Xenon lamp,<br>$\lambda \geq 420$ nm             | 100             | 100                 | [13]      |
| CPN                                                          | 1968                                                                                           | Xenon lamp, 420-<br>700 nm,                            | 10              | 15                  | [14]      |
| C-N-g-C <sub>3</sub> N <sub>4</sub>                          | 49                                                                                             | 40 mW·cm <sup>-2</sup> ,<br>Xenon lamp, 420-<br>700 nm | 20              | 15                  | [15]      |
| g-C <sub>3</sub> N <sub>4</sub> -PWO                         | 62.5                                                                                           | 300 W Xenon lamp,<br>$\lambda \geq 420$ nm             | 100             | 100                 | [16]      |
| KNiCN                                                        | 398                                                                                            | 300 W Xenon lamp,<br>$\lambda \geq 420$ nm             | 10              | 50                  | This work |

## REREFENCES

- [1] Y. J. Zhao, Y. Liu, Z. Z. Wang, Y. R. Ma, Y. J. Zhou, X. F. Shi, Q. Y. Wu, X. Wang, M. W. Shao, H. Huang, Y. Liu, Z. H. Kang, Carbon nitride assisted 2D conductive metal-organic frameworks composite photocatalyst for efficient visible light-driven H<sub>2</sub>O<sub>2</sub> production, *Appl. Catal. B: Environ.*, 2021, **289**, 120035–120042.
- [2] Y. X. Ye, C. Wen, J. H. Pan, J. W. Wang, Y. J. Tong, S. B. Wei, Z. F. Ke, L. Jiang, F. Zhu, N. B. Zhou, M. J. Zhou, J. Q. Xu, G. F. Ouyang, Visible-light driven efficient overall H<sub>2</sub>O<sub>2</sub> production on modified graphitic carbon nitride under ambient conditions, *Appl. Catal. B: Environ.*, 2021, **285**, 119726–119733.
- [3] C. Chu, Q. H. Zhu, Z. H. Pan, S. Gupta, D. H. Huang, Y. H. Du, S. Weon, Y. S. Wu, C. Muhich, E. Stavitski, K. Domen, J. H. Kim, Spatially separating redox centers on 2D carbon nitride with cobalt single atom for photocatalytic H<sub>2</sub>O<sub>2</sub> production, *PNAS*, 2020, **117**, 6376–6382.
- [4] Y. Kofuji, Y. Isobe, Y. Shiraishi, H. Sakamoto, S. Tanaka, S. Ichikawa, T. Hirai, Carbon nitride–aromatic diimide–graphene nanohybrids: metal-free photocatalysts for solar-to-hydrogen peroxide energy conversion with 0.2% efficiency, *J. Am. Chem. Soc.*, 2016, **138**, 10019–10025.
- [5] Z. D. Zhu, H. H. Pan, M. Murugananthan, J. Y. Gong, Y. R. Zhang, Visible light-driven photocatalytically active g-C<sub>3</sub>N<sub>4</sub> material for enhanced generation of H<sub>2</sub>O<sub>2</sub>, *Appl. Catal. B: Environ.*, 2018, **232**, 19–25.

- [6] J. J. Cao, Q. Y. Wu, Y. J. Zhao, K. Q. Wei, Y. Li, X. Wang, F. Liao, H. Huang, M. W. Shao, Y. Liu, Z. H. Kang, In-situ photovoltage transients assisted catalytic study on H<sub>2</sub>O<sub>2</sub> photoproduction over organic molecules modified carbon nitride photocatalyst, *Appl. Catal. B: Environ.*, 2020, **285**, 119817–119826.
- [7] L. Zhou, J. Y. Lei, F. C. Wang, L. Z. Wang, M. R. Hoffmann, Y. D. Liu, S. I. In, J. L. Zhang, Carbon nitride nanotubes with in situ grafted hydroxyl groups for highly efficient spontaneous H<sub>2</sub>O<sub>2</sub> production, *Appl. Catal. B: Environ.*, 2021, **288**, 119993–120001.
- [8] S. N. Li, G. H. Dong, R. Hailili, L. P. Yang, Y. X. Li, F. Wang, Y. B. Zeng, C. Y. Wang, Effective photocatalytic H<sub>2</sub>O<sub>2</sub> production under visible light irradiation at g-C<sub>3</sub>N<sub>4</sub> modulated by carbon vacancies, *Appl. Catal. B: Environ.*, 2016, **190**, 26–35.
- [9] S. Zhao, X. Zhao, H. Zhang, J. Li, Y. F. Zhu, Covalent combination of polyoxometalate and graphitic carbon nitride for light-driven hydrogen peroxide production, *Nano Energy*, 2017, **35**, 405–414.
- [10] Y. Kofuji, S. Ohkita, Y. Shiraishi, H. Sakamoto, S. Tanaka, S. Ichikawa, T. Hirai, Graphitic carbon nitride doped with biphenyl diimide: efficient photocatalyst for hydrogen peroxide production from water and molecular oxygen by sunlight, *ACS Catal.*, 2016, **6**, 7021–7029.
- [11] Z. Y. Teng, W. N. Cai, S. X. Liu, C. Y. Wang, Q. T. Zhang, C. L. Su, T. Ohno, Bandgap engineering of polymeric carbon nitride copolymerized by 2,5,8-triamino-tri-s-triazine (melem) and barbituric acid for efficient nonsacrificial

- photocatalytic H<sub>2</sub>O<sub>2</sub> production, *Appl. Catal. B: Environ.*, 2020, **271**, 118917–118928.
- [12] X. K. Zeng, Y. Liu, Y. Kang, Q. Y. Li, Y. Xia, Y. L. Zhu, H. L. Hou, M. H. Uddin, T. R. Gengenbach, D. H. Xia, C. H. Sun, D. T. Mccarthy, A. Deletic, J. G. Yu, X. W. Zhang, Simultaneously tuning charge separation and oxygen reduction pathway on graphitic carbon nitride by polyethylenimine for boosted photocatalytic hydrogen peroxide production, *ACS Catal.*, 2020, **10**, 3697–3706.
- [13] S. Zhao, X. Zhao, Insights into the role of singlet oxygen in the photocatalytic hydrogen peroxide production over polyoxometalates-derived metal oxides incorporated into graphitic carbon nitride framework, *Appl. Catal. B: Environ.*, 2019, **250**, 408–418.
- [14] J. J. Cao, H. Wang, Y. J. Zhao, Y. Liu, Q. Y. Wu, H. Huang, M. W. Shao, Y. Liu, Z. H. Kang, Phosphorus-doped porous carbon nitride for efficient sole production of hydrogen peroxide via photocatalytic water splitting with a two-channel pathway, *J. Mater. Chem. A*, 2020, **8**, 3701–3707.
- [15] Y. J. Fu, C. A. Liu, M. L. Zhang, C. Zhu, H. Li, H. B. Wang, Y. X. Song, H. Huang, Y. Liu, Z. H. Kang, Photocatalytic H<sub>2</sub>O<sub>2</sub> and H<sub>2</sub> generation from living chlorella vulgaris and carbon micro particle comodified g-C<sub>3</sub>N<sub>4</sub>, *Adv. Energy Mater.*, 2018, **8**, 1802525–1802533.
- [16] S. Zhao, X. Zhao, Polyoxometalates-derived metal oxides incorporated into graphitic carbon nitride framework for photocatalytic hydrogen peroxide production under visible light, *J. Catal.*, 2018, **366**, 98–106.
